# Supplementary material for: Causal relationship between green tea intake and gastrointestinal disorders: a two-sample Mendelian randomization study
Source: Front Nutr. 2024 Sep 20;11:1426779. doi: 10.3389/fnut.2024.1426779 (PMC11449853; doi:10.3389/fnut.2024.1426779)
Supplement: Supplementary file 1 [file Table_1.XLSX]

## Sheet: Table S1
Table S1. STROBE-MR checklist of the present study.
No.	Section	Checklist item	Position
1	Title and abstract	Indicate MR as the study’s design in the title and the abstract as a main purpose of the study	Title, Abstract
2	Background	Explain the scientific background and rationale for the reported study. Explain the exposure and a plausible potential causal relationship between exposure and outcome. Justify why MR is a helpful method to address the study question.	Introduction:P1-P3
3	Objectives	State specific objectives clearly, including prespecified causal hypotheses. State that MR is a method that intends to estimate causal effects.	Introduction: P3
4a	Study design and data sourses	Setting: Describe the study design (two-sample MR) and the underlying population. Describe the setting, locations, and relevant dates, including periods of recruitment, exposure, follow-up, and data collection.	Methods: Mendelian randomization study design, Figure 1, Table S2
4b		Participants: Report the eligibility criteria and the sources and methods of selection of participants. Report the sample size and whether any power or sample size calculations were carried out prior to the main analysis.	Methods: Data Sources, Table S2
4c		Describe measurement, quality control, and selection of genetic variants.	Methods: Selection of Genetic Instruments
4d		For each exposure, outcome, and other relevant variables, describe methods of assessment and diagnostic criteria for diseases.	Table S2, Table S3
4e		Provide details of ethics committee approval and participant informed consent, if relevant.	Methods: Mendelian randomization study design, Data Sources
5	Assumptions	Explicitly state the 3 core instrumental variable (IV) assumptions for the main analysis (relevance, independence, and exclusion restriction), as well assumptions for any additional or sensitivity analysis.	Methods: Mendelian randomization study design, Selection of Genetic Instruments
6a	Statistical methods:	Describe how quantitative variables were handled in the analyses.	Methods: Selection of Genetic Instruments
6b		Describe how genetic variants were handled in the analyses and, if applicable, how their weights were selected
6c		Describe the MR estimator and related statistics. Detail the included covariates and, in case of 2-sample MR, whether the same covariate set was used for adjustment in the 2 samples.	Methods: Two-sample Mendelian Randomization Analysis
6d		Explain how missing data were addressed.	Methods: Two-sample Mendelian Randomization Analysis
6e		Indicate how multiple testing was addressed (Bonferroni correction)	Methods: Two-sample Mendelian Randomization Analysis
7	Assessment of assumptions	Describe any methods or prior knowledge used to assess the assumptions or justify their validity	Methods: Two-sample Mendelian Randomization Analysis
8	Sensitivity analyses and additional analyses	Describe any sensitivity analyses or additional analyses performed (eg, comparison of effect estimates from different approaches, independent replication, bias analytic techniques, validation of instruments, simulations).	Methods: Sensitivity Analysis
9a	Software and preregistration	Name statistical software and package(s), including version and settings used.	Methods: Sensitivity analysis
9b		State whether the study protocol and details were preregistered (as well as when and where).	N/A
10a	Descriptive data	Report the numbers of individuals at each stage of included studies and reasons for exclusion. Use of a flow diagram.	N/A
10b		Report summary statistics for phenotypic exposure , outcomes, and other relevant variables (eg, means, SDs, proportions).	Table S2, Table S3
10c		If the data sources include meta-analyses of previous studies, provide the assessments of heterogeneity across these studies.	N/A
10d		For 2-sample MR:
		i. Provide justification of the similarity of the genetic variant–exposure associations between the exposure and outcome samples.	Methods: Selection of Genetic Instruments
		ii. Provide information on the number of individuals who overlap between the exposure and outcome studies.	N/A
11a	Main results	Report the associations between genetic variant and exposure and between genetic variant and outcome, preferably on an interpretable scale.	Results: Univariable MR estimates and sensitivity analyses, Multivariate MR estimates and sensitivity analyses
11b		Report MR estimates of the relationship between exposure and outcome and the measures of uncertainty from the MR analysis, on an interpretable scale, such as odds ratio or relative risk per SD difference.	Results: Univariable MR estimates and sensitivity analyses, Multivariate MR estimates and sensitivity analyses
11c		If relevant, consider translating estimates of relative risk into absolute risk for a meaningful time period.	N/A
11d		Consider plots to visualize results (eg, forest plot, scatterplot of associations between genetic variants and outcome vs between genetic variants and exposure).	Results: Figure 2-9
12a	Assessment of assumptions	Report the assessment of the validity of the assumptions by removing confounders-related SNPs.	Results: Univariable MR estimates and sensitivity analyses, Multivariate MR estimates and sensitivity analyses
12b		Report any additional statistics (eg, assessments of heterogeneity across genetic variants, such as I2, Q statistic).	Results: Univariable MR estimates and sensitivity analyses, Multivariate MR estimates and sensitivity analyses
13a	Sensitivity analyses and additional analyses	Report any sensitivity analyses to assess the robustness of the main results to violations of the assumptions.	Results: Univariable MR estimates and sensitivity analyses, Multivariate MR estimates and sensitivity analyses
13b		Report results from other sensitivity analyses or additional analyses	Results: Univariable MR estimates and sensitivity analyses, Multivariate MR estimates and sensitivity analyses
13c		Report any assessment of the direction of the causal relationship.	Results: Figure 2-9
13d		When relevant, report and compare with estimates from other RCTs and meta-analyses.	N/A
13e		Consider additional plots to visualize results.	All Figure and Table
14	Key results	Summarize key results with reference to study objectives.	Discussion: P1
15	Limitations	Discuss limitations of the study, taking into account the validity of the IV assumptions, other sources of potential bias, and imprecision. Discuss both direction and magnitude of any potential bias and any efforts to address them.	Discussion: P9
16a	Interpretation	Meaning: Give a cautious overall interpretation of results in the context of their limitations and in comparison with other studies.	Discussion: P1
16b		Mechanism: Discuss underlying biological mechanisms that could drive a potential causal relationship between the investigated exposure and the outcome, and whether the gene-environment equivalence assumption is reasonable. Use causal language carefully, clarifying that IV estimates may provide causal effects only under certain assumptions.	Discussion:P6-7
16c		Clinical relevance: Discuss whether the results have clinical or public policy relevance, and to what extent they inform effect sizes of possible interventions.	Discussion: P2-5
17		Discuss the generalizability of the study results (a) to other populations, (b) across other exposure periods/timings, and (c) across other levels of exposure.	Discussion: P9
18	Funding	Describe sources of funding and the role of funders in the present study.	Funding
19	Data and data sharing	Provide the data used to perform all analyses or report where and how the data can be accessed, and reference these sources in the article.	Table S2
20	Conflicts of interest	All authors should declare all potential conflicts of interest.	Conflict of interest
Three fundamental assumptions
a. The instrument variables (IVs) must be associated with exposures;
b. The IVs must not be associated with any confounders, such as age, sex, lifestyle;
c. The IVs must influence the outcomes only through exposures and not through any direct or alternative pathways.

## Sheet: Table S2
Table S1. Information of data sources used in the MR study.
Traits	Consortium or Cohort Study	Ancestry	Sample size (cases/controls)		Number of SNPs	Data sources
Green tea intake	UKBiobank	European	64949		9851867	http://www.nealelab.is/uk-biobank/ (accessed on 14 April 2024)
Crohn’s disease	UKBiobank	European	732/336,467		10894596
Intestinal obstruction	UKBiobank	European	2,102/359,092		10533539
Hiatus hernia	UKBiobank	European	10,810/473,788		9587836	Dönertaş HM et al., 2021 (PMID: 33959723) [1]
Diverticular disease	UKBiobank	European	5,218/479,380		9587836
Non-alcoholic fatty liver disease	UKBiobank	European	4,761/373,227		9097254	Fairfield CJ et al., 2021 (PMID: 34535985) [2]
Oesophagitis	FinnGen	European	747/189,695		16380373	https://finngen.gitbook.io/documentation/ (accessed on 14 April 2024)
Gastroduodenal ulcer	FinnGen	European	4,510/189,695		16380400
Acute gastritis	FinnGen	European	1,284/189,695		16380389
Chronic gastritis	FinnGen	European	5,213/189,695		16380395
Irritable bowel syndrome	FinnGen	European	4,605/182,423		16380376
Alcoholic liver disease	FinnGen	European	1,416/217,376		16380466
Cholecystitis	FinnGen	European	19,883/195,144		16380454
Cholelithiasis	FinnGen	European	19,023/195,144		16380452
Acute pancreatitis	FinnGen	European	3,022/195,144		16380428
Chronic pancreatitis	FinnGen	European	1,737/195,144		16380413
Acute appendicitis	FinnGen	European	15,627/201,886		16380463
Gastroesophageal reflux	Meta analysis of three cohort studies	European	32,957/434,296		24173002	Sakaue S et al., 2021 (PMID: 34594039) [3]
Esophageal cancer	Meta analysis of three cohort studies	European	998/475,308		24194380
Gastric ulcer	Meta analysis of three cohort studies	European	6,293/467,985		24178780
Gastric cancer	Meta analysis of three cohort studies	European	1,029/475,087		24188662
Ulcerative colitis	Meta analysis of three cohort studies	European	5,371/412,561		24187301
Colorectal cancer	Meta analysis of three cohort studies	European	6,581/463,421		24182361
Cirrhosis	Meta analysis of three cohort studies	European	122/347,284		19079888
Pancreatic cancer	Meta analysis of three cohort studies	European	1,196/475,049		24195229
Cholangitis	Meta analysis of two cohort studies	European	2,871/12,019		7891603	Ji SG et al., 2017 (PMID: 27992413) [4]
Smoking initiation	GSCAN	European	311,629/ 321,173		11802365	Liu M et al., 2019 (PMID: 30643251) [5]
Alcoholic drinks per week	GSCAN	European	335394		11887865
[1] Dönertaş HM, Fabian DK, Valenzuela MF, Partridge L, Thornton JM. Common genetic associations between age-related diseases. Nat Aging. 2021;1(4):400-412. doi:10.1038/s43587-021-00051-5
[2] Fairfield CJ, Drake TM, Pius R, et al. Genome-Wide Association Study of NAFLD Using Electronic Health Records. Hepatol Commun. 2022;6(2):297-308. doi:10.1002/hep4.1805
[3] Sakaue S, Kanai M, Tanigawa Y, et al. A cross-population atlas of genetic associations for 220 human phenotypes. Nat Genet. 2021;53(10):1415-1424. doi:10.1038/s41588-021-00931-x
[4] Ji SG, Juran BD, Mucha S, et al. Genome-wide association study of primary sclerosing cholangitis identifies new risk loci and quantifies the genetic relationship with inflammatory bowel disease. Nat Genet. 2017;49(2):269-273. doi:10.1038/ng.3745
[5] Liu M, Jiang Y, Wedow R, et al. Association studies of up to 1.2 million individuals yield new insights into the genetic etiology of tobacco and alcohol use. Nat Genet. 2019;51(2):237-244. doi:10.1038/s41588-018-0307-5

## Sheet: Table S3
Table S2. Detailed information on genetic instruments of green tea intake.
SNP	Gene	Chromosome	Position	Effect allele	Other allele	Beta	Standard error	P-value	EAF	Sample size	R2	F statistic
rs12144868	SCMH1	1	41539745	C	T	3.07273	0.527463	5.69994e-09	0.015146	64949	0.000522234	33.9353
rs145313301	CTNNA2	2	79537576	C	G	4.99373	0.812513	7.90005e-10	0.006149	64949	0.000581252	37.7725
rs144954030	IKZF2	2	213836477	C	T	4.88015	0.821066	2.80001e-09	0.005665	64949	0.000543628	35.3262
rs142811251	NA	2	22985272	C	G	3.45976	0.617814	2.1e-08	0.010296	64949	0.000482608	31.3591
rs115952340	LOC105377043	3	40875392	A	G	3.00972	0.550266	4.49997e-08	0.01334	64949	0.000460399	29.9153
rs78547201	IPO11	5	61713522	G	C	3.27496	0.577735	1.40001e-08	0.011607	64949	0.000494501	32.1323
rs116985617	VNN2	6	133084903	T	C	3.89273	0.674419	7.79992e-09	0.008531	64949	0.000512689	33.3147
rs79774709	DCBLD1	6	117931871	T	C	5.14056	0.853785	1.7e-09	0.005782	64949	0.000557839	36.2502
rs189140232	NA	7	35517966	A	G	3.56083	0.625652	1.29999e-08	0.010006	64949	0.00049848	32.3909
rs11976995	PTPRN2	7	157531582	G	T	2.01942	0.348689	7.00003e-09	0.030423	64949	0.000516155	33.54
rs116035596	LINGO2	9	28832005	T	C	4.90357	0.742882	4.10015e-11	0.006559	64949	0.000670381	43.5684
rs79638269	CDNF	10	14841242	T	C	2.67635	0.472895	1.5e-08	0.016328	64949	0.000492912	32.029
rs644205	PTEN	10	89745814	A	G	0.848874	0.150756	1.79999e-08	0.196485	64949	0.000487925	31.7047
rs183788045	VEGFB	11	64006281	T	G	3.54822	0.64978	4.70002e-08	0.008749	64949	0.000458898	29.8178
rs117251267	ABCC4	13	95673607	C	T	3.55014	0.617762	9.09997e-09	0.01159	64949	0.000508224	33.0244
rs142373582	NA	14	104757781	C	T	3.24633	0.565762	9.59997e-09	0.014186	64949	0.00050667	32.9234
rs113898417	METTL9	16	21614895	G	C	3.97893	0.726631	4.39997e-08	0.006957	64949	0.000461458	29.9841
rs62059726	ABCC3	17	48715705	A	G	2.8216	0.511814	3.50002e-08	0.015194	64949	0.000467725	30.3916
rs12958992	LOC105372190	18	71259772	G	A	2.16091	0.378903	1.2e-08	0.026945	64949	0.000500527	32.524
rs117077082	FITM2	20	42928868	G	A	1.92055	0.34217	2e-08	0.031795	64949	0.000484824	31.5032
rs113322644	C21orf59	21	33992170	A	C	3.20963	0.555077	7.39997e-09	0.011694	64949	0.000514526	33.4341
											0.0107239

## Sheet: Table S4
Table S3. Details for Mendelian randomization studies with tightened instrument variables selection.
Outcome: Gastrointestinal diseases		MR-EGGER										Weighted Median				ivw							MR-PRESSO
		nsnp	b	se	pval	Q	Q_df	Q_pval	egger_intercept	egger_se	pval.1	wm.nsnp	wm.b	wm.se	wm.pval	ivw.nsnp	ivw.b	ivw.se	ivw.pval	ivw.Q	ivw.Q_df	ivw.Q_pval	Global test RSSobs	T-State	Global test Pvalue
Upper gastrointestinal diseases	Oesophagitis	20	-0.0118133	0.0293463	0.692022	14.632	18	0.68706	-0.0470984	0.0748692	0.537203	20	-0.0461707	0.0219029	0.0350332	20	-0.0275942	0.0152283	0.0699802	15.0277	19	0.720832	16.9876	-2.0375	0.722
	Hiatus hernia	13	-5.66427e-05	0.000259368	0.831126	10.4101	11	0.49392	-0.000421862	0.000536991	0.448691	13	-0.000215201	0.000169629	0.204563	13	-0.000236188	0.000122634	0.05411	11.0273	12	0.526584	12.9362	-2.00911	0.551
	Gastroesophageal reflux	21	-0.00642881	0.00531769	0.241512	20.192	19	0.383107	0.00322664	0.0131353	0.808589	21	-0.000828153	0.00371851	0.823761	21	-0.00530878	0.00267147	0.0468984	20.2562	20	0.442012	22.0137	-1.98722	0.473
	Esophageal cancer	21	-0.00668568	0.0246481	0.789127	14.4698	19	0.755649	0.00260958	0.0523239	0.960744	21	-0.00281356	0.0185428	0.879397	21	-0.00567585	0.0140555	0.686347	14.4723	20	0.805767	15.8601	-0.474714	0.81
	Gastric ulcer	21	-0.0160778	0.0093654	0.102289	6.95287	19	0.99446	0.0229381	0.019283	0.248877	21	-0.00440718	0.00704029	0.531318	21	-0.00701947	0.00545197	0.197916	8.36789	20	0.98914	9.43237	-1.99048	0.991
	Gastroduodenal ulcer	20	-0.00630792	0.0130096	0.633619	19.6232	18	0.354428	-0.0116372	0.0331561	0.729677	20	-0.00244605	0.00925751	0.791608	20	-0.010208	0.00660767	0.122377	19.7575	19	0.409302	21.28	-1.54487	0.442
	Acute gastritis	20	0.0177023	0.023422	0.459546	19.3932	18	0.367993	-0.109294	0.0598354	0.0843948	20	0.00321001	0.0180662	0.858974	20	-0.0188677	0.0128809	0.142981	22.9879	19	0.237876	26.9864	-1.46478	0.217
	Chronic gastritis	20	0.00369855	0.0115408	0.752299	11.6912	18	0.862766	-0.0232231	0.0294948	0.441315	20	-0.00497978	0.00803458	0.535393	20	-0.00406832	0.00599037	0.497047	12.3111	19	0.871901	13.0572	-0.843704	0.895
	Gastric cancer	21	-0.00464106	0.0224583	0.83848	23.2704	19	0.225642	-0.0358445	0.0356577	0.327414	21	-0.0412065	0.0180408	0.0223673	21	-0.022658	0.0135364	0.0941575	24.508	20	0.220905	27.8296	-1.67386	0.228
Lower gastrointestinal diseases	Intestinal obstruction	17	-3.63415e-05	0.000133907	0.789787	15.885	15	0.389736	4.85291e-05	0.000306313	0.876231	17	-4.37896e-05	8.77007e-05	0.617563	17	-1.78639e-05	6.39331e-05	0.779926	15.9116	16	0.459149	18.0334	-0.280191	0.472
	Irritable bowel disease	20	0.00442124	0.0127675	0.733141	19.7744	18	0.345662	-0.0136018	0.0325885	0.681336	20	-0.00505452	0.0087643	0.56413	20	-0.000136614	0.00646982	0.983153	19.9658	19	0.396639	22.1289	-0.0211156	0.4
	Diverticular disease	13	-0.000170882	0.000181681	0.367125	10.21	11	0.511599	-3.58287e-05	0.000376148	0.925828	13	-0.000239573	0.000118891	0.0438981	13	-0.000186131	8.59024e-05	0.0302522	10.2191	12	0.596745	12.0686	-2.348	0.621
	Crohn’s disease	20	0.000102411	7.25883e-05	0.175339	15.5951	18	0.620781	-4.37678e-05	0.00017808	0.808636	20	6.94038e-05	5.04708e-05	0.169092	20	8.70622e-05	3.70005e-05	0.0186227	15.6555	19	0.680124	17.3649	2.59218	0.686
	Ulcerative colitis	21	-0.0142558	0.0129339	0.284141	22.7146	19	0.250147	0.040538	0.032102	0.221944	21	0.00367544	0.00898581	0.68252	21	-0.000280332	0.00679244	0.96708	24.621	20	0.216318	28.3696	-0.0412712	0.181
	Colorectal cancer	21	-0.00996211	0.00985458	0.32476	12.0302	19	0.884332	0.0122082	0.0213193	0.573607	21	-0.00244746	0.00744595	0.742384	21	-0.00531086	0.00558003	0.341217	12.3581	20	0.903201	13.5674	-1.21079	0.909
Hepatobiliary and pancreatic diseases	Non-alcoholic fatty liver disease	13	-0.0280204	0.0174199	0.13602	8.90294	11	0.630851	0.0565056	0.0363891	0.148747	13	-0.00167177	0.0115943	0.885351	13	-0.00417398	0.00822309	0.611739	11.3142	12	0.502203	13.2023	-0.522751	0.534
	Alcoholic liver disease	20	-0.0023983	0.0284222	0.933685	31.4192	18	0.025732	0.0402132	0.072381	0.58534	20	0.0124736	0.0163976	0.446837	20	0.0110829	0.0145275	0.445528	31.958	19	0.0315967	33.8816	0.762892	0.059
	Cirrhosis	20	-0.0283293	0.0545852	0.610088	15.5001	18	0.627392	0.0949196	0.0674442	0.176349	20	0.0693611	0.045179	0.124722	20	0.0359257	0.0299181	0.229829	17.4808	19	0.557329	20.5834	1.25189	0.506
	Cholangitis	8	-0.0040002	0.0324014	0.905777	3.61041	6	0.729227	0.097189	0.0571685	0.140031	8	0.0259296	0.0234199	0.268225	8	0.0430276	0.0168709	0.01076	6.50056	7	0.482661	8.65794	2.64656	0.493
	Cholecystitis	20	-0.00297955	0.00664063	0.659013	15.1775	18	0.649748	-0.00796266	0.016943	0.644022	20	-0.000634227	0.00477561	0.894347	20	-0.00564589	0.00345104	0.10184	15.3983	19	0.696967	17.8399	-1.81728	0.672
	Cholelithiasis	20	-0.00345821	0.00678069	0.616243	16.6002	18	0.550731	-0.00656254	0.0173032	0.708927	20	-0.00363153	0.0049523	0.463374	20	-0.00565548	0.00352327	0.108454	16.7441	19	0.607201	19.324	-1.7099	0.588
	Acute pancreatitis	20	-0.00164835	0.0149715	0.913549	11.8354	18	0.855616	-0.0222083	0.0381643	0.567843	20	0.0019996	0.0110303	0.856146	20	-0.0090938	0.00777419	0.242105	12.1741	19	0.878051	13.7669	-1.46133	0.868
	Chronic pancreatitis	20	0.00603272	0.0225305	0.79193	23.6883	18	0.165508	-0.0111862	0.0574192	0.847719	20	0.00715754	0.0142246	0.614838	20	0.00228067	0.0113919	0.841323	23.7382	19	0.206387	25.608	0.84345	0.239
	Pancreatic cancer	21	-0.0328961	0.0238587	0.183978	11.5137	19	0.905346	0.0751326	0.0562931	0.19776	21	-0.00671578	0.0171242	0.694925	21	-0.00606116	0.0128446	0.637009	13.2951	20	0.864368	14.6816	-0.578769	0.863
Other	Acute appendicitis	20	-0.00323333	0.0079374	0.688552	23.8596	18	0.159683	0.0183553	0.0202298	0.376215	20	0.00697644	0.00536262	0.193279	20	0.00292229	0.00410102	0.476109	24.9508	19	0.162167	27.4939	0.712575	0.168

## Sheet: Table S5
Table S4. The results of pleiotropy test, Cochrane’s Q between green tea intake on gastrointestinal diseases.
Outcome: Gastrointestinal diseases		Egger_intercept	P for pleiotropy	Cochrane’s Q	P for Cochrane’s Q	T-State	P for MR-PRESSO
Upper gastrointestinal diseases	Oesophagitis	-0.0470984	0.537203	15.0277	0.720832	-2.0375	0.722
	Hiatus hernia	-0.000421862	0.448691	11.0273	0.526584	-2.00911	0.551
	Gastroesophageal reflux	0.00322664	0.808589	20.2562	0.442012	-1.98722	0.473
	Esophageal cancer	0.00260958	0.960744	14.4723	0.805767	-0.474714	0.81
	Gastric ulcer	0.0229381	0.248877	8.36789	0.98914	-1.99048	0.991
	Gastroduodenal ulcer	-0.0116372	0.729677	19.7575	0.409302	-1.54487	0.442
	Acute gastritis	-0.109294	0.0843948	22.9879	0.237876	-1.46478	0.217
	Chronic gastritis	-0.0232231	0.441315	12.3111	0.871901	-0.843704	0.895
	Gastric cancer	-0.0358445	0.327414	24.508	0.220905	-1.67386	0.228
Lower gastrointestinal diseases	Intestinal obstruction	4.85291e-05	0.876231	15.9116	0.459149	-0.280191	0.472
	Irritable bowel disease	-0.0136018	0.681336	19.9658	0.396639	-0.0211156	0.4
	Diverticular disease	-3.58287e-05	0.925828	10.2191	0.596745	-2.348	0.621
	Crohn’s disease	-4.37678e-05	0.808636	15.6555	0.680124	2.59218	0.686
	Ulcerative colitis	0.040538	0.221944	24.621	0.216318	-0.0412712	0.181
	Colorectal cancer	0.0122082	0.573607	12.3581	0.903201	-1.21079	0.909
Hepatobiliary and pancreatic diseases	Non-alcoholic fatty liver disease	0.0565056	0.148747	11.3142	0.502203	-0.522751	0.534
	Alcoholic liver disease	0.0402132	0.58534	31.958	0.0315967	0.762892	0.059
	Cirrhosis	0.0949196	0.176349	17.4808	0.557329	1.25189	0.506
	Cholangitis	0.097189	0.140031	6.50056	0.482661	2.64656	0.493
	Cholecystitis	-0.00796266	0.644022	15.3983	0.696967	-1.81728	0.672
	Cholelithiasis	-0.00656254	0.708927	16.7441	0.607201	-1.7099	0.588
	Acute pancreatitis	-0.0222083	0.567843	12.1741	0.878051	-1.46133	0.868
	Chronic pancreatitis	-0.0111862	0.847719	23.7382	0.206387	0.84345	0.239
	Pancreatic cancer	0.0751326	0.19776	13.2951	0.864368	-0.578769	0.863
Other	Acute appendicitis	0.0183553	0.376215	24.9508	0.162167	0.712575	0.168

## Sheet: Table S6
Table S5. Multivariate MR results of green tea intake on the risk of fve gastrointestinal disorders in European populations after adjusting for smoking and alcohol consumption
Outcome: Gastrointestinal diseases		MVMR-IVW					MVMR-EGGER
		nsnp	OR (95% CI)	P value	Q	Q_pval	OR (95% CI)	P value	Q	Q_pval	Pinter
Upper gastrointestinal diseases	Oesophagitis	17	0.9667 (0.9405-0.9936)	0.0156219	104.65	0.818919	0.9667 (0.9387-0.9954)	0.0233299	104.46	0.808855	0.663329
	Hiatus hernia	9	0.9998 (0.9996-1.0001)	0.28243	145.163	0.0191306	0.9998 (0.9996-1.0001)	0.254962	142.327	0.0240882	0.136972
	Gastroesophageal reflux	17	0.9949 (0.9880-1.0019)	0.152738	211.779	3.54731e-07	0.9950 (0.9880-1.0019)	0.155288	211.525	2.77469e-07	0.706585
	Esophageal cancer	17	0.9960 (0.9675-1.0252)	0.783459	149.802	0.0294609	0.9947 (0.9664-1.0237)	0.71561	146.698	0.0377296	0.11411
	Gastric ulcer	17	0.9954 (0.9861-1.0048)	0.335411	109.233	0.728328	0.9952 (0.9855-1.0050)	0.334168	108.737	0.717618	0.481432
	Gastroduodenal ulcer	17	0.9942 (0.9814-1.0071)	0.378323	128.004	0.270112	0.9942 (0.9814-1.0072)	0.380358	127.947	0.25039	0.819403
	Acute gastritis	17	0.9792 (0.9573-1.0017)	0.0699389	120.448	0.445655	0.9793 (0.9574-1.0016)	0.0686573	115.504	0.547811	0.0261894
	Chronic gastritis	17	0.9974 (0.9868-1.0081)	0.629934	102.095	0.866215	0.9974 (0.9859-1.0090)	0.65589	101.811	0.855955	0.594202
	Gastric cancer	17	0.9810 (0.9628-0.9996)	0.0457396	118.298	0.500925	0.9821 (0.9636-1.0009)	0.0615793	117.385	0.49867	0.339243
Lower gastrointestinal diseases	Intestinal obstruction	13	0.9999 (0.9998-1.0001)	0.433401	135.22	0.107221	0.9999 (0.9998-1.0001)	0.429304	134.904	0.0990585	0.60368
	Irritable bowel disease	17	1.0014 (0.9884-1.0145)	0.83639	135.932	0.137386	1.0014 (0.9884-1.0145)	0.837143	135.815	0.125312	0.749942
	Diverticular disease	9	1.0000 (0.9998-1.0002)	0.837971	170.099	0.000332168	1.0000 (0.9998-1.0002)	0.860823	169.296	0.000306852	0.467957
	Crohn’s disease	16	1.0001 (1.0000-1.0002)	0.00700367	121.085	0.40422	1.0001 (1.0000-1.0002)	0.00727203	121.077	0.37944	0.927462
	Ulcerative colitis	17	0.9997 (0.9871-1.0124)	0.9616	133.067	0.178522	0.9996 (0.9871-1.0123)	0.952526	130.896	0.196633	0.161802
	Colorectal cancer	17	0.9971 (0.9862-1.0081)	0.598712	134.666	0.154612	0.9970 (0.9860-1.0081)	0.59414	134.628	0.140458	0.853755
Hepatobiliary and pancreatic diseases	Non-alcoholic fatty liver disease	9	1.0001 (0.9773-1.0233)	0.996215	218.351	5.29683e-09	0.9988 (0.9765-1.0217)	0.920086	209.286	3.64719e-08	0.0290525
	Alcoholic liver disease	17	1.0152 (0.9909-1.0402)	0.22151	151.058	0.025086	1.0153 (0.9912-1.0400)	0.215179	146.616	0.0381132	0.0586512
	Cirrhosis	16	1.0206 (0.9811-1.0617)	0.311181	122.601	0.367318	1.0187 (0.9787-1.0603)	0.364669	122.191	0.35275	0.531053
	Cholangitis	7	1.0344 (1.0000-1.0699)	0.0500294	134.523	0.00581211	1.0354 (1.0008-1.0713)	0.0448759	133.89	0.00530575	0.502945
	Cholecystitis	17	0.9968 (0.9871-1.0066)	0.519496	258.605	2.37014e-12	0.9968 (0.9870-1.0066)	0.520442	258.111	1.82053e-12	0.634848
	Cholelithiasis	17	0.9964 (0.9865-1.0065)	0.486622	259.813	1.69543e-12	0.9964 (0.9865-1.0065)	0.487245	258.927	1.45026e-12	0.525321
	Acute pancreatitis	17	0.9908 (0.9771-1.0048)	0.197898	104.193	0.831234	0.9908 (0.9761-1.0058)	0.228282	104.193	0.81395	0.997766
	Chronic pancreatitis	17	0.9986 (0.9783-1.0194)	0.897636	131.038	0.212334	0.9986 (0.9782-1.0195)	0.897774	131.001	0.19487	0.854123
	Pancreatic cancer	17	0.9872 (0.9658-1.0091)	0.249171	94.4	0.953126	0.9873 (0.9633-1.0119)	0.308406	94.3076	0.946883	0.761185
Other	Acute appendicitis	17	1.0019 (0.9935-1.0102)	0.663016	174.134	0.000743752	1.0019 (0.9936-1.0102)	0.661397	172.219	0.000841283	0.252079
